# Supplementary material for: Daily Nutritional Intake of Pediatric Patients (N = 64) on Extracorporeal Membrane Oxygenation from 2018 to 2022: A Single-Center Report
Source: MDPI journal article supplement (doi:10.3390/nu15143221), 2023-07-20
Supplement: s1 [file s1]

# Enteral Feeding Guideline

## **1Contraindications to Enteral Nutrition**

### **Definite contraindications to enteral nutrition**

- Escalating vasoactive or inotropic support
- Hemodynamic instability with ongoing volume resuscitation
- Suspected or confirmed necrotizing enterocolitis or intestinal ischemia
- Mechanical bowel obstruction
- Significant gastrointestinal bleeding

### **Relative contraindications to enteral nutrition**

- First 24 hours after cardiac surgery or open chest
- Ongoing central hypothermia
- Less than 24 hours after cardiac arrest
- Severe ileus with high nasogastric output and/or emesis
- High gastrointestinal stomal output
- Intractable diarrhea

## **2When to consider post-pyloric feeds?**

### **Aspiration Risk**

- Previous history of aspiration
- Witnessed regurgitation or aspiration of gastric contents
- Severe gastro-esophageal reflux disease
- Altered mental status with depressed gag and cough reflexes.
- Persistent vomiting (2 or more episodes in a 24-hour period).
- Noninvasive ventilation **WITH** escalating or high settings.

### **NPO for greater than 24 hours and...**

- anticipate the patient will remain on respiratory support and not safe for NG feedings. Do not start feedings if respiratory status remains unstable and patient may need intubation.

## **3Bowel Regimen**

**Osmotic laxative:** Miralax, Lactulose

**Stimulant laxative:** Senna, Bisacodyl

**Emollient laxative (softener):** Docusate

**Rectal options:** glycerin suppository, docusate suppository, sodium phosphate enema

## **4Signs and Symptoms of Intolerance**

- Vomiting (2 or more episodes/24 hours)
- Abdominal discomfort with distention and tenderness
- Diarrhea- 3 or more episodes of loose stool in 24 hours not related to antibiotics or a bowel regimen.
- \*There is no evidence to support the use of abdominal girth or gastric residual as a sign of feeding intolerance.*

## **Nutritional Goals**

| Age       | Kcal/Kg/day |
|-----------|-------------|
| 0-3 mo    | 102         |
| 4-36 mo   | 82          |
| 4-6 yrs   | 65          |
| 7-10 yrs  | 55          |
| 11-18 yrs | 40          |

\* if the patient is mechanically ventilated, subtract 10% of the total daily calories. Do not subtract for NIPPV.

## **NPO time for Procedures**

- All tube feedings must be stopped 8 hours prior to scheduled surgery/sedation (Breastmilk can be held 6 hours prior).
- Intubated patients with post-pyloric feeds do not need to have feedings stopped. (If extubating, stop post-pyloric feedings 8hrs prior).
- Clear liquids and medications may be given in all types of tubes until 2 hours prior to scheduled surgery (broth and breastmilk are not considered clear).
