# Supplementary material for: Daily Nutritional Intake of Pediatric Patients (N = 64) on Extracorporeal Membrane Oxygenation from 2018 to 2022: A Single-Center Report
Source: MDPI journal article supplement (doi:10.3390/nu15143221), 2023-07-20
Supplement: s1 [file s1]

# Enteral Feeding Guideline

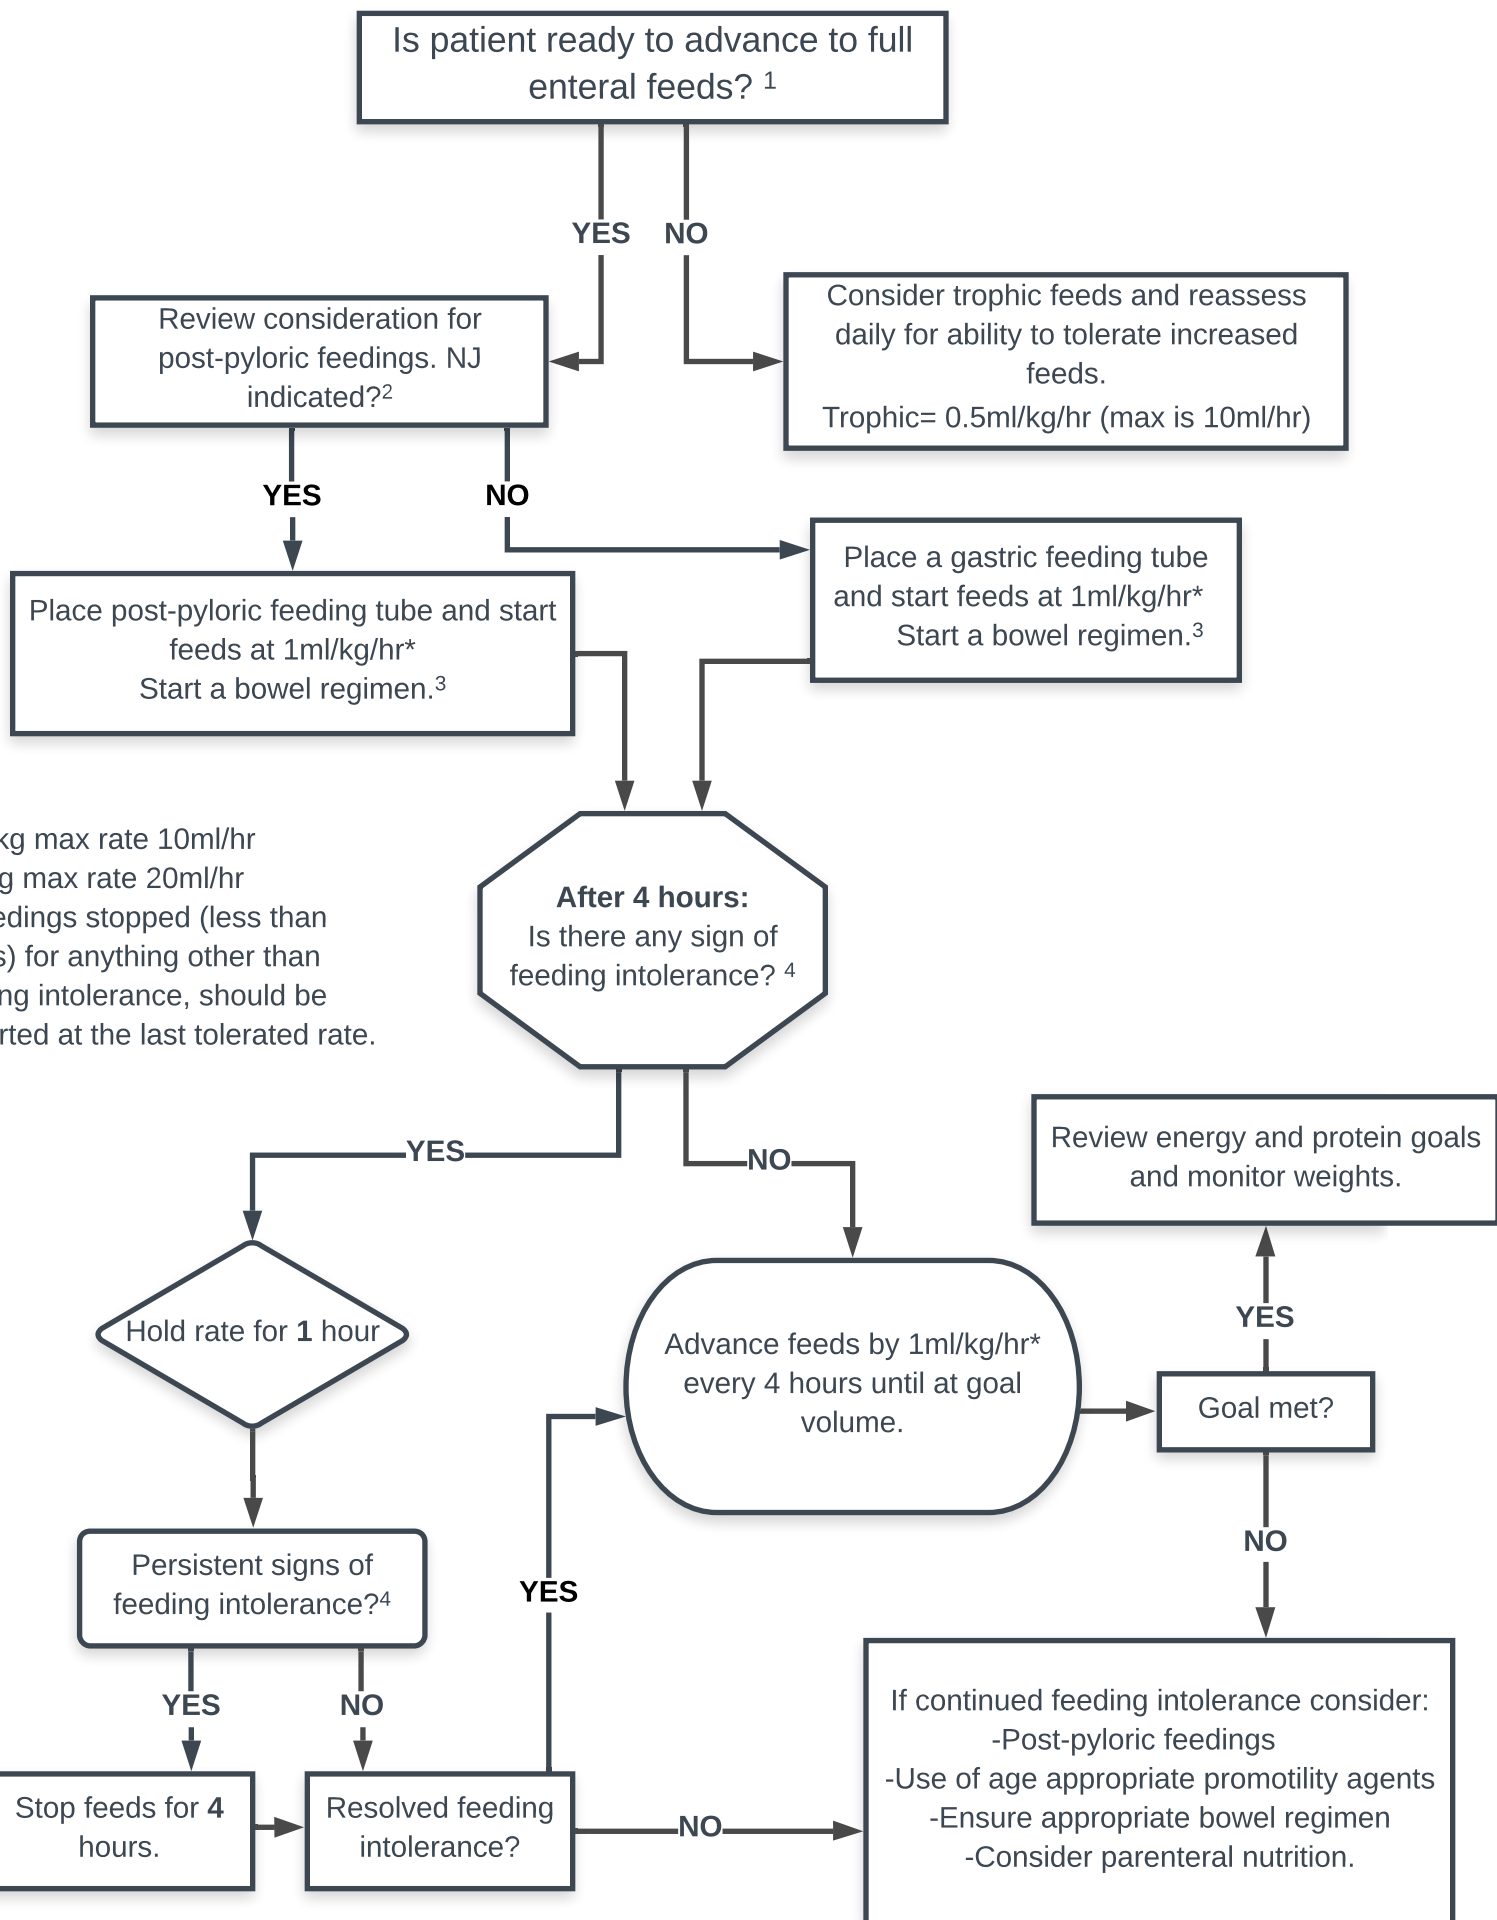

\*<40kg max rate 10ml/hr

>40kg max rate 20ml/hr

\*\*Feedings stopped (less than 24hrs) for anything other than feeding intolerance, should be restarted at the last tolerated rate.
