# Supplementary material for: Daily Nutritional Intake of Pediatric Patients (N = 64) on Extracorporeal Membrane Oxygenation from 2018 to 2022: A Single-Center Report
Source: MDPI journal article supplement (doi:10.3390/nu15143221), 2023-07-20
Supplement: s1 [file s1]

## Supplemental

Supplemental information S1:

The RN must choose one of the following when admitting the patient, it is part of the Pediatric Patient Profile that they fill out:

Nutrition Risk Screen  
No indicators present  
NPO/clear liquid greater than 5 days  
Difficulty chewing/swallowing  
Failure to grow or gain weight  
Feeding intolerance (excluding gastroenteritis)  
Large or nonhealing wound, burn or pressure injury  
<50% oral intake greater than 5 days  
Tube feeding or parenteral nutrition  
Supplemental drinks consumed at home  
Unintentional weight loss  
Other (see comments)

### Medical Nutrition Therapy Standards of Care booklet.

Reasons for Completing Nutrition Assessments:

- Enteral Feeds or TPN/PPN
- NPO/CL  $\geq 5$  consecutive days
- Calorie Count
- Difficulty Chewing/Swallowing (that is impacting nutritional intake)
- Unintentional Weight Loss
- $\leq 50\%$  usual intake for 5 days
- Admitting Diagnosis
  - Inborn Errors of Metabolism
  - Cystic Fibrosis
  - Failure to Thrive
  - Burns
  - Bone Marrow Transplant
  - Ketogenic Diet
  - Eating Disorder

#### For normal advancement

If weight is less than 3 kg, begin at 1 mL per hour and advance by 1 mL per hour every 6 hours.

If weight is greater than 3 kg, begin at 2 mL per hour and advance by 2 mL per hour every 6 hours.

#### For high-risk advancement

If weight is less than 3 kg, begin at 1 mL per hour and advance by 1 mL per hour every 12 hours

If weight is greater than 3 kg, begin at 1 mL per hour and advance by 1 mL per hour every 6 hours.

DRI reference: Dietary Intakes, Institute of Medicine of the National Academies

Infants and Young Children

Estimated Energy Requirements (kcal/day) = Total Energy Expenditure + Energy Deposition

0-3 months       $EER = (89 \times \text{weight [kg]} - 100) + 175$

4-6 months       $EER = (89 \times \text{weight [kg]} - 100) + 56$

7-12 months       $EER = (89 \times \text{weight [kg]} - 100) + 22$

13-35 months       $EER = (89 \times \text{weight [kg]} - 100) + 20$

**Supplemental Table S1.** Nutrition Information

| Variable                             | Overall (N=64)            |
|--------------------------------------|---------------------------|
| Feed Type Same Across ECMO Days      | 18 (28.1)                 |
| Calories Present                     | 48 (75.0)                 |
| Calories Total                       | 1942.69 [456.90, 3844.40] |
| Protein Present                      | 48 (75.0)                 |
| Protein Total                        | 73.78 [22.55, 188.94]     |
| Proportion of Days on Extra Protein  | 50.00 [21.11, 73.86]      |
| Proportion of Days Calorie Goal Met  | 0.00 [0.00, 0.00]         |
| Proportion of Days Calories Underfed | 100.00 [97.73, 100.00]    |
| Proportion of Days Protein Goal Met  | N=63; 33.33 [0.00, 56.25] |
| Proportion of Days Protein Underfed  | 63.07 [43.30, 100.00]     |

Note: The proportion of days calories or protein underfed are 100 because everyone had a 100% that were underfed across the days. Numeric data is expressed as median [25<sup>th</sup>, 75<sup>th</sup> percentile] and categorical data is expressed as count (percent).

**Supplemental Table S2. Nutrition Information by Mortality**

- The proportion of days calories or protein underfed are 100 because everyone had a 100% that were underfed across the days.

| Variable                                                     | Alive 28-day (N=36)         | Deceased 28-day (N=28)      | <i>p</i> -value |
|--------------------------------------------------------------|-----------------------------|-----------------------------|-----------------|
| Feed Type Same Across ECMO Days                              | 8 (22.2)                    | 10 (35.7)                   | 0.2337          |
| Parenteral                                                   | 2 (25.0)                    | 2 (20.0)                    |                 |
| No Nutrition Support                                         | 6 (75.0)                    | 8 (80.0)                    |                 |
| Calories/Proteins Present                                    | 29 (80.6)                   | 19 (67.9)                   | 0.2445          |
| Calories Total                                               | 2129.30 [400.50, 4003.20]   | 1854.30 [513.30, 3423.04]   | 0.6129          |
| Protein Total                                                | 63.39 [20.70, 195.68]       | 84.25 [24.40, 173.70]       | 0.8661          |
| Proportion of Days on Extra Protein                          | 43.56 [25.00, 66.67]        | 50.00 [17.71, 100.00]       | 0.4498          |
| Proportion of Days Calorie Goal Met                          | 0.00 [0.00, 2.27]           | 0.00 [0.00, 0.00]           | 0.3306          |
| Proportion of Days Protein Goal Met                          | N=35<br>27.27 [0.00, 54.55] | N=28<br>33.33 [0.00, 57.67] | 0.9659          |
| Overall Percent of Calorie Goal (including patients with 0)  | 35.1 [5.7, 49.7]            | 28 [1.5, 51.2]              | 0.9396          |
| Percent of Calorie goal (patients that received > 0 of goal) | 41.63 [19.15, 50.42]        | 41.1 [23.2, 55.2]           | 1.0             |

Notes: Numeric data is expressed as median [25<sup>th</sup>, 75<sup>th</sup> percentile] and categorical data is expressed as count (percent).

## Models

**Supplemental Table S3.** Multiple Linear Regression Model – Percent Feed Goal Met

Variables below not included in final model due to insignificance

| Summary of Backward Elimination |                                                          |                  |
|---------------------------------|----------------------------------------------------------|------------------|
| Step                            | Label                                                    | <i>p</i> - Value |
| 1                               | Were there any ECMO complications?                       | 0.9065           |
| 2                               | Feeding intolerance                                      | 0.7853           |
| 3                               | Congenital Heart Disease                                 | 0.6782           |
| 4                               | Prematurity                                              | 0.6478           |
| 5                               | G or J-tube dependence                                   | 0.6592           |
| 6                               | Failure to thrive                                        | 0.4063           |
| 7                               | Chromosomal abnormality                                  | 0.3717           |
| 8                               | Cardiac arrest in the 24 hours prior to ECMO initiation? | 0.3400           |
| 9                               | Prior bowel surgery                                      | 0.3562           |
| 10                              | Neonatal vs. Pediatric                                   | 0.1316           |

| Model Summary                              |        |
|--------------------------------------------|--------|
| Number of Observations Read                | 64     |
| Number of Observations Used                | 60     |
| Number of Observations with Missing Values | 4      |
| Adjusted R-Square                          | 0.1004 |

**Supplemental Table S4. Regression models with Outcomes – Percent Feed Goal Met (Independent Variable)**

| <b>Logistic Regression</b> | <b>n</b> | <b>Odds Ratio</b>    | <b><i>p</i>-value</b> |
|----------------------------|----------|----------------------|-----------------------|
| 28 day Mortality (Yes)     | 60       | 0.997 (0.975, 1.020) | 0.8139                |

**Summary:**

- Model 1: Logistic regression with 28 day Mortality as the outcome and Percent Calorie Goal met as the predictor was modeled. The model did not find any significant association between the percent of the calorie goal met and 28 day mortality.

| <b>Simple Linear Regression</b> | <b>N</b> | <b>Estimate</b>    | <b>% change</b> | <b><i>p</i>-value</b> |
|---------------------------------|----------|--------------------|-----------------|-----------------------|
| Hospital Length of Stay         | 59       | 0.01 (-0.01, 0.02) | 0.6 (-0.6, 1.8) | 0.3149                |
| PICU Length of Stay             | 60       | 0.01 (0, 0.02)     | 0.8 (-0.5, 2.2) | 0.2128                |
| Days Mechanical Ventilation     | 34       | 0.01 (-0.01, 0.04) | 1.5 (-0.8, 3.8) | 0.2064                |

**Summary:**

- Model 2: Linear regression with Hospital Length of Stay as the outcome and Percent calorie goal met as the predictor did not find any statistically significant association between hospital length of stay and the percent of the calorie goal met.
- Model 3: Linear regression with PICU Length of Stay as the outcome and Percent calorie goal met as the predictor did not find any statistically significant association between PICU length of stay and the percent of the calorie goal met.
- Model 4: Linear regression with Days Mechanical Ventilation as the outcome and Percent calorie goal met as the predictor did not find any statistically significant association Days Mechanical Ventilation and the percent of the calorie goal met.
